# Supplementary material for: Semiconducting behavior of type-I Si clathrate K8Ga8Si38
Source: Royal Society of Chemistry journal article supplement (doi:10.1039/c1dt10071h), 2011-01-01
Supplement: c1dt10071h.pdf [file c1dt10071h.pdf]

# Semiconducting Behavior of Type-I Si Clathrate

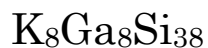

Motoharu Imai

National Institute for Materials Science, 1-2-1 Sengen, Tsukuba, Ibaraki 305-0041,  
JAPAN

Akira Sato

National Institute for Materials Science, 1-1 Namiki, Tsukuba, Ibaraki 305-0041,  
JAPAN

Haruhiko Udono

College of Engineering, Ibaraki University, 4-12-1 Nakanarusawa, Hitachi, Ibaraki  
316-8511, JAPAN

Yoji Imai

National Institute for Advanced Industrial Science and Technology, AIST Tsukuba  
Central 5, Higashi 1-1, Tsukuba, Ibaraki 305-8565, JAPAN

Hiroyuki Tajima

Institute for Solid State Physics, University of Tokyo, 5-1-5 Kashiwanoha, Kashiwa,  
Chiba 277-8581, JAPAN

## Supplementary Material

|                                                                                                      |    |
|------------------------------------------------------------------------------------------------------|----|
| Table S1. Experimental and refined details for the single-crystal measurements.                      | S2 |
| Table S2. Atomic positions and displacement parameters of $\text{K}_8\text{Ga}_{16}\text{Si}_{38}$ . | S4 |

S1. Experimental and refined details for the single-crystal measurements.

---

|                                                             |                                                                             |
|-------------------------------------------------------------|-----------------------------------------------------------------------------|
| Crystal data                                                |                                                                             |
| Chemical Formula<br>(Structural analysis)                   | $K_8Ga_{8.3(1)}Si_{37.7}$                                                   |
| $M_r$                                                       | 1950.283                                                                    |
| Crystal color                                               | Gray, Metallic luster                                                       |
| Crystal size (mm)                                           | 0.20 x 0.15 x 0.04                                                          |
| Temperature (K)                                             | 293                                                                         |
| Space group                                                 | $Pm\bar{3}n$ (No. 223)                                                      |
| $A$ (Å)                                                     | 10.4261(2)                                                                  |
| $V$ (Å <sup>3</sup> )                                       | 1133.35(4)                                                                  |
| $Z$                                                         | 1                                                                           |
| $D_x$ (g/cm <sup>3</sup> )                                  | 2.858                                                                       |
| $\mu(MoK\alpha)$ (cm <sup>-1</sup> )                        | 6.580                                                                       |
| Data Collection                                             |                                                                             |
| Radiation                                                   | MoK $\alpha$ ( $\lambda = 0.71073$ Å)                                       |
| Diffractionmeter                                            | Bruker SMART APEX CCD                                                       |
| Data collection method                                      | $\omega$ scans                                                              |
| Absorption correction                                       | Empirical<br>SADABS in SAINT-Plus-NT                                        |
| $T_{min}, T_{max}$                                          | 0.3612, 0.5276                                                              |
| $2\theta_{max}$ (°)                                         | 61.04                                                                       |
| No. of measured,<br>independent and observed<br>reflections | 8352, 338, 321                                                              |
| $R_{int}$                                                   | 3.15                                                                        |
| Refinement                                                  |                                                                             |
| No. of parameters                                           | 19                                                                          |
| Refinement on                                               | $F^2$                                                                       |
| $R[F^2 > 2\sigma(F^2)], wR(F^2), S$                         | 1.30, 3.27, 1.098                                                           |
| Weighting scheme                                            | $w = 1/[\sigma^2(F_o^2) + (0.0381P)^2]$ ,<br>where $P = (F_o^2 + 2F_c^2)/3$ |
| $(\Delta/\sigma)_{max}$                                     | 0.001                                                                       |
| $\Delta\rho_{max}, \Delta\rho_{min}$ (eÅ <sup>-3</sup> )    | 0.27, -0.30                                                                 |

---

Programs

Data collection: SMART-NT (Bruker, 1999) [S1.1]; cell refinement: SAINT-Plus-NT (Bruker, 1999) [S1.2]; data reduction: SAINT-Plus-NT (Bruker, 1999) [S1.2]; program used to refine structure: SHELXL-97 (Sheldrick, 1997) [S1.3].

## References

- [S1.1] Bruker (1999). SMART-NT. Version 5.625. Bruker AXS Inc., Madison, Wisconsin, USA.
- [S1.2] Bruker (1999). SAINT-plus-NT. Version 6.45. Bruker AXS Inc., Madison, Wisconsin, USA.
- [S1.3] G.M. Sheldrick, A short history of SHELX, *Acta Cryst.* **A64** (2008) 112-122.

S.2 Atomic positions and displacement parameters of  $K_8Ga_{16}Si_{38}$ .

| Atom | Multiplicity      |            |            | z          | Occ.                    | $U_{eq}$  |
|------|-------------------|------------|------------|------------|-------------------------|-----------|
|      | Wyckoff<br>Letter | x          | y          |            |                         |           |
| K1   | 2a                | 0          | 0          | 0          | 1                       | 0.0127(2) |
| K2   | 6d                | 1/4        | 1/2        | 0          | 1                       | 0.0266(2) |
| E1   | 6c                | 1/4        | 0          | 1/2        | 0.607(5) Ga<br>0.393 Si | 0.0097(1) |
| E2   | 16i               | 0.18442(2) | x          | x          | 0.026(2) Ga<br>0.974 Si | 0.0088(2) |
| E3   | 24k               | 0          | 0.30577(2) | 0.11804(3) | 0.179(2) Ga<br>0.821 Si | 0.0095(1) |

| Atom | $U_{11}$  | $U_{22}$  | $U_{33}$  | $U_{12}$    | $U_{13}$ | $U_{23}$    |
|------|-----------|-----------|-----------|-------------|----------|-------------|
| K1   | 0.0127(2) | $U_{11}$  | $U_{11}$  | 0           | 0        | 0           |
| K2   | 0.0179(3) | 0.0310(3) | $U_{22}$  | 0           | 0        | 0           |
| E1   | 0.0107(2) | 0.0092(2) | $U_{22}$  | 0           | 0        | 0           |
| E2   | 0.0088(2) | $U_{11}$  | $U_{11}$  | -0.00051(8) | $U_{12}$ | $U_{12}$    |
| E3   | 0.0092(2) | 0.0098(2) | 0.0096(2) | 0           | 0        | -0.00018(9) |
